# Supplementary material
Source: HighWire-hosted journal article supplement (https://erj.ersjournals.com/content/61/6/2201763)

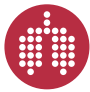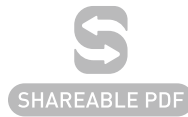

# Preterm birth and asthma and COPD in adulthood: a nationwide register study from two Nordic countries

Anna Pulakka <sup>1,2</sup>, Kari Risnes <sup>3,4</sup>, Johanna Metsälä <sup>1</sup>, Suvi Alenius <sup>1,5</sup>, Katriina Heikkilä <sup>1</sup>, Sara Marie Nilssen <sup>3,6</sup>, Pieta Näsänen-Gilmore <sup>1,7,8</sup>, Peija Haaramo<sup>9</sup>, Mika Gissler <sup>10,11,12</sup>, Signe Opdahl <sup>13</sup> and Eero Kajantie <sup>1,8,13</sup>

<sup>1</sup>Population Health Unit, Finnish Institute for Health and Welfare, Helsinki, Finland. <sup>2</sup>Research Unit of Population Health, Faculty of Medicine, University of Oulu, Oulu, Finland. <sup>3</sup>Department of Clinical and Molecular Medicine, Norwegian University of Science and Technology, Trondheim, Norway. <sup>4</sup>Children's Clinic, St. Olavs University Hospital, Trondheim, Norway. <sup>5</sup>Children's Hospital, University of Helsinki and Helsinki University Hospital, Helsinki, Finland. <sup>6</sup>Center for Health Care Improvement, St. Olavs University Hospital, Trondheim, Norway. <sup>7</sup>Faculty of Medicine, and Health Technology, Tampere Center for Child, Adolescent, and Maternal Health Research: Global Health Group, Tampere University, Tampere, Finland. <sup>8</sup>PEDEGO Research Unit, MRC Oulu, Oulu University Hospital and University of Oulu, Oulu, Finland. <sup>9</sup>Finnish Social and Health Data Permit Authority Findata, Helsinki, Finland. <sup>10</sup>Department of Knowledge Brokers, Finnish Institute for Health and Welfare, Helsinki, Finland. <sup>11</sup>Academic Primary Health Care Centre, Region Stockholm, Stockholm, Sweden. <sup>12</sup>Department of Molecular Medicine and Surgery, Karolinska Institutet, Stockholm, Sweden. <sup>13</sup>Department of Public Health and Nursing, Norwegian University of Science and Technology, Trondheim, Norway.

Corresponding author: Anna Pulakka ([anna.pulakka@thl.fi](mailto:anna.pulakka@thl.fi))

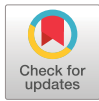

Shareable abstract (@ERSpublications)

In this population-based study of 2.4 million people from Finland and Norway, adults born preterm were at higher risk for asthma and COPD at ages 18–50 years. The risks were observed across all gestational ages before full term in a dose-response manner. <https://bit.ly/3YqnUGe>

**Cite this article as:** Pulakka A, Risnes K, Metsälä J, *et al.* Preterm birth and asthma and COPD in adulthood: a nationwide register study from two Nordic countries. *Eur Respir J* 2023; 61: 2201763 [DOI: 10.1183/13993003.01763-2022].

This single-page version can be shared freely online.

Copyright ©The authors 2023.

This version is distributed under the terms of the Creative Commons Attribution Non-Commercial Licence 4.0. For commercial reproduction rights and permissions contact [permissions@ersnet.org](mailto:permissions@ersnet.org)

This article has an editorial commentary:  
<https://doi.org/10.1183/13993003.00662-2023>

Received: 14 Sept 2022  
Accepted: 28 Feb 2023

## Abstract

**Background** Preterm birth affects lungs in several ways but few studies have follow-up until adulthood. We investigated the association of the entire spectrum of gestational ages with specialist care episodes for obstructive airway disease (asthma and chronic obstructive pulmonary disease (COPD)) at age 18–50 years.

**Methods** We used nationwide registry data on 706 717 people born 1987–1998 in Finland (4.8% preterm) and 1 669 528 born 1967–1999 in Norway (5.0% preterm). Care episodes of asthma and COPD were obtained from specialised healthcare registers, available in Finland for 2005–2016 and in Norway for 2008–2017. We used logistic regression to estimate odds ratios (ORs) for having a care episode with either disease outcome.

**Results** Odds of any obstructive airway disease in adulthood for those born at <28 or 28–31 completed weeks were 2–3-fold of those born full term (39–41 completed weeks), persisting after adjustments. For individuals born at 32–33, 34–36 or 37–38 weeks, the odds were 1.1- to 1.5-fold. Associations were similar in the Finnish and the Norwegian data and among people aged 18–29 and 30–50 years. For COPD at age 30–50 years, the OR was 7.44 (95% CI 3.49–15.85) for those born at <28 weeks, 3.18 (95% CI 2.23–4.54) for those born at 28–31 weeks and 2.32 (95% CI 1.72–3.12) for those born at 32–33 weeks. Bronchopulmonary dysplasia in infancy increased the odds further for those born at <28 and 28–31 weeks.

**Conclusion** Preterm birth is a risk factor for asthma and COPD in adulthood. The high odds of COPD call for diagnostic vigilance when adults born very preterm present with respiratory symptoms.

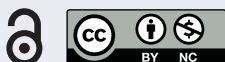

Supplement: inline-supplementary-material-2 [file inline-supplementary-material-2.pdf]
